# Supplementary material for: Children with abnormal body weight dealing with the load of school backpack—is there a need to modify WHO recommendations? A cross sectional study
Source: PeerJ journal article supplement (doi:10.7717/peerj.19353), 2025-06-02
Supplement: Data.xlsx [file Data.xlsx]

## Sheet: Data
					eyes-open without schoolbag						eyes-closed without schoolbag						eyes-open with schoolbag						eyes-closed with schoolbag
ID Poland	Age	Sex	z-score BMI	Groups	BWD (Body Weight Distibution)	SPL (COP path length)	WoE (Width of the ellipse)	HoE (Height of the ellipse)	AoE (Area of the ellipse)	aoE (Angle of the ellipse)	BWD (Body Weight Distibution)	SPL (COP path length)	WoE (Width of the ellipse)	HoE (Height of the ellipse)	AoE (Area of the ellipse)	aoE (Angle of the ellipse)	BWD (Body Weight Distibution)	SPL (COP path length)	WoE (Width of the ellipse)	HoE (Height of the ellipse)	AoE (Area of the ellipse)	aoE (Angle of the ellipse)	BWD (Body Weight Distibution)	SPL (COP path length)	WoE (Width of the ellipse)	HoE (Height of the ellipse)	AoE (Area of the ellipse)	aoE (Angle of the ellipse)
1	9	ch	-2.07	Ia	4	83.69	5.87	3.31	15.28	13.61	14	72.88	1.89	2.53	3.75	18.34	28	78.07	1.45	2.54	2.89	8.9	30	475.63	12.38	4.15	7.76	30.4
2	8	ch	-2.31	Ia	10	117.01	1.73	2.88	3.92	0.55	8	116.83	2.3	4.78	8.63	5.9	6	92.82	1.96	3.59	5.53	4.66	14	392.32	14.18	2.49	8.19	37.98
3	9	dz	-2.35	Ia	14	115.08	5.81	3.88	17.72	31.28	14	102.21	4.23	8.09	36.9	13.16	8	99.44	3.01	3.71	8.76	2.78	6	300.23	5.14	6.62	26.73	4.64
4	9	ch	-2.03	Ia	22	93.04	4.74	3.06	11.38	37.57	18	117.43	5.25	5.8	23.94	20.6	14	99.81	4.43	6.25	21.76	20.65	4	221.1	4.85	8.81	33.56	6.03
5	8	ch	-2.64	Ia	6	127.08	1.47	3.9	4.5	9.95	2	127.26	1.77	2.8	3.89	5.02	8	124.82	1.71	2.62	3.51	19.05	6	123.83	11.62	3.83	4.87	10.11
6	8	dz	-2.04	Ia	16.6	204.3	14.8	9.4	309.2	64.9	5.8	180	7.1	11.1	171.5	20.8	2	137.4	3.6	7.2	66.6	2.1	3.4	209.1	8.9	18.5	245.4	23.4
7	8	dz	-2.87	Ia	0.6	156.4	3.3	15.1	117	3.6	5	238.7	4.1	10.5	101.5	2.1	9	153.4	4.1	8.4	70	17.4	6.4	226.9	14.4	11.1	105.9	3.7
8	8	dz	-4.11	Ia	1.2	321.2	10.5	20.7	388	14.3	7.8	381.3	11.8	23.5	581.1	8.1	9.8	194.7	11.1	25	599.2	9.6	15.3	760.7	20.4	48.4	2175.6	18.8
9	8	ch	-2.44	Ia	1.2	370.6	10	17	385.9	12	9.6	333.4	12.7	21.5	569.1	9.4	1.2	205.6	7.8	9.5	150.7	56.2	7.6	382.6	12.3	23.9	506.6	1.9
10	9	dz	-4.18	Ia	0.2	171.2	5.6	12.3	135.6	27.4	10.8	244.8	4.7	13.7	143.9	1.1	2.6	213.2	6.9	10.5	138.9	14.6	3.5	321.7	4.3	14.6	152.9	10.7
11	9	ch	-2.29	Ia	8.2	166.2	5.1	5.8	55	9.9	3.8	234.9	3.8	14.3	123.4	12.3	9.4	224.4	6.1	8.1	109.6	2.7	10.2	228.9	4.4	10.7	91.9	11.2
12	8	dz	-3.67	Ia	6	249.7	7.1	9.6	157.9	3.9	2.6	218.6	5.1	7.7	93.3	10.8	0.2	238.5	9.2	8.8	128.1	27.2	1.6	278.8	7.3	11.1	174	5.7
13	8	dz	-2.16	Ia	3.6	149.9	4.1	9.2	89.1	0.3	8.2	279.6	6.1	17.7	177.3	5.4	1	297.4	8.9	8.1	164.8	15.7	4.8	374.2	10.9	16.1	363.8	19.3
14	7	dz	-3.18	Ia	7.8	436.6	12.1	12.8	293.8	5.5	13.8	356.7	8.3	11.2	248.3	1.9	1.2	305.9	7.7	11.9	180.9	8.9	0.2	365.5	11	14.3	332.1	26.3
15	9	ch	-2.05	Ia	10.2	251.7	8	16.9	221.8	11.3	4.4	277.3	7.5	12	188.6	33	2.6	338	14.4	18.4	524.8	48.1	10.6	332	8.5	18.1	372.5	13.3
16	8	dz	-2.02	Ia	11	339.5	8.5	18.7	390	13.5	8.1	383.5	6.1	11.4	161.6	7.1	5.2	341.6	9.3	11.6	223.5	27	2.3	476.4	9.1	14.1	337.8	54.2
17	9	ch	-2.39	Ia	8.2	292.2	8.5	8.3	189.9	3.2	8.4	378.4	9.6	10.7	238	13.5	7	343.9	12.8	19.5	511.9	17.5	2.4	269.4	9.3	16	229.2	43.9
18	7	ch	-2.31	Ia	4.4	299.7	5.9	11.1	158.2	1.7	10	325.5	15.4	17.1	578.3	7.4	5.4	344.3	23	13.1	490.8	76.2	13.2	384.9	8.9	15.9	251.1	23.2
19	8	dz	-2.87	Ia	8.2	317.6	9.7	10.5	210.8	13.4	7.5	490.4	17.2	16.4	607.2	17.9	5.4	725.4	27.7	23.4	1038.1	20.7	4.3	467.4	10.4	18.4	430.4	6
20	8	dz	-2.42	Ia	22	91.76	4.27	6.82	22.86	10.08	10	106.58	5.93	7.95	37.01	34.04	10	89.8	4.23	3.3	10.95	38.86	6	303.75	15.69	4.97	22.2	23.92
21	8	dz	-2.06	Ia	2	73.71	1.63	3.91	5.01	2.49	2	82.64	2.14	5.55	9.31	-5.56	0	95.38	4.18	6.63	21.78	28.55	6	287.02	2.11	6.72	11.11	5.67
22	8	dz	-2.14	Ia	17.4	152.6	4.7	9.7	112.7	3.6	10.2	214.7	5.5	9.6	79.3	22.3	5.6	140.6	7.4	7.7	124.8	62	0.6	289.7	3.2	10.8	101.2	5.4
23	7	dz	-2.38	Ia	8.6	113	4.3	5.7	48.1	12.4	11.6	155.9	2.8	8.4	51.5	2.3	4.6	145.3	9.1	10.7	112.9	26.7	1.8	256.6	12	9.8	44.4	0.5
24	7	dz	-3.35	Ia	1.4	215.4	6.5	18.6	138.3	11.1	0.8	206.7	4.5	8.3	81.8	11.2	5.4	197.5	3.6	9	66.4	0.9	5.2	231.5	4.6	9.2	105.1	4.5
25	8	dz	-2.02	Ia	12	127.3	5	7.2	81.5	26	13.2	207.8	3.2	9.6	59.8	13.2	1.2	200.6	3.5	9.7	85.8	7.6	3.2	290.1	7.3	9.5	118.9	7.3
26	9	ch	-2.92	Ia	8.4	281.3	7.2	13.5	169.2	2.7	11	449.7	7.5	11.8	214.6	10.6	0.8	240.4	7.4	9.3	160.4	5.6	7.2	279.8	6.4	7.7	146.7	6.7
27	8	dz	-2.16	Ia	4.2	204.5	4.9	15.3	156.6	1.2	3.2	246.8	5	14.2	119.3	3.7	2	244.9	16.8	13.5	397.7	9	3.8	333.5	9.4	14.7	287.7	15.4
28	9	dz	-2.07	Ia	27.6	181.2	10.3	8.7	199.9	73.3	16.7	299.6	4.6	13.7	151.6	4.9	7	246.8	11.8	18	378.5	26.5	1.8	365	13.2	28.4	556.1	6.1
29	8	dz	-2.42	Ia	4	260.2	9.8	14.3	213.1	22.2	4.2	196	8.1	12.2	153.2	30.4	13.4	248	6.4	11.2	211.8	8.7	10.6	309.6	5.8	7.5	98.9	1
30	8	dz	-2.87	Ia	2.8	275.8	11.2	12.2	300.6	17.8	3.6	369.1	6.6	19.4	232.6	12.7	1.4	255.7	12	8.4	209.6	38.8	1.6	368	10.1	20.4	393.5	5.8
31	9	dz	-3.12	Ia	18.8	121	3.1	12	86.1	10.7	15.2	167.8	8.8	7.1	142.5	64.5	13.4	264.7	7.4	19.6	295.7	24.9	17.9	388.1	16.8	15.6	216	9.4
32	8	dz	-4.15	Ia	8	245.1	5.8	16.9	233.3	71.8	8.5	314.9	6.9	19.1	311.7	82	7.8	269.9	8.8	8.6	219.5	33	7	429.4	15.1	17.6	667.7	72.2
33	7	ch	-2.03	Ia	1	423.1	14.4	17.2	443.3	11.2	7.2	690	13.8	33.6	954.3	9.9	4.2	276.7	7.8	10.5	137.7	1.1	3.6	653.1	21.2	26.3	1272.8	34.1
34	7	ch	-2.48	Ia	17	295.8	11.1	15.6	363.5	1.5	12.6	347.9	5.1	17.4	248.2	2.8	17.6	283.7	8.4	17.5	350.9	16	12.6	396.4	7.8	19.1	371.3	1.1
35	7	ch	-2.31	Ia	10.8	226.9	9.2	16.5	231.6	10.2	7.6	228.4	5.7	8.1	113.5	26.5	7.6	283.8	11.5	16.1	369.7	1.4	7.8	317.9	14.6	10.7	249.8	16.7
36	7	dz	-2.02	Ia	7.6	279.3	6.8	12.1	153.4	1.3	10.4	321.9	9.1	11.3	152.7	13.9	6.4	298.8	20.1	13.6	382.9	40.5	2.4	459.9	15	14.6	488.4	25.6
37	9	dz	-2.51	Ia	3	313.5	6.3	23.7	274	9.5	3.9	492.3	26.2	21.2	807.5	0.7	5.8	311.9	9.3	15.2	264.4	40.8	0.7	375.3	9.8	21.8	429.3	1.5
38	8	ch	-2.2	Ia	3	240.5	10.2	12	277.5	38.7	8.8	296.1	10.2	17.7	369.5	3.7	10.8	314.1	13	20.5	518.6	24.5	11.2	377.1	6.3	21.6	302.1	5.8
39	7	ch	-3.14	Ia	7.6	261.2	9.2	19.5	319.6	14.1	13.8	318.6	11.7	22.7	536.3	16.4	9.6	316.5	12.9	12.5	364.8	40.2	7.4	421.1	12.5	18.6	593.4	16.4
40	9	dz	-2.02	Ia	5	310.9	5.9	10.7	169.7	1.6	2.6	461	7	13.7	259.7	14.1	9.8	319.1	10.9	10.6	298.2	47.4	2.8	441.7	11.9	15.6	499.8	11.9
41	9	dz	-2.39	Ia	14.8	211.1	4.4	8.1	60.5	9.6	14.4	190.9	3.2	7.3	43.5	14.2	1.8	331.1	10.1	8.7	190.4	50.3	0	411.5	15.7	7.7	76.2	16
42	7	ch	-2.2	Ia	2.4	264.4	7.4	11.5	144.9	9.4	2.6	352.3	10.7	22.8	332	15.1	13.4	334.8	8.9	10.4	218.6	11.5	13.6	436.9	15.6	12.6	369.9	3.5
43	7	ch	-2.19	Ia	13.6	251	6.2	8.7	144	5.1	13.6	411.5	10.6	19.7	356	8.5	17	335.7	9.7	18.5	363.3	12.6	17.4	448.2	14.1	24.4	698.1	42
44	8	ch	-2.74	Ia	6.6	182.5	6.5	13.4	218.7	3.4	9.8	490.5	15.5	19	703.7	0.9	0.2	358.7	9.4	21.5	462.5	42.7	4.7	652.5	17	29	1208.3	77.1
45	7	dz	-2.33	Ia	16.2	277.4	8.9	13.9	320.8	16.4	16.6	287.2	27.2	19.4	830.6	21.6	0.2	390.5	13.3	19.5	587.4	7.7	6.2	486.7	10.7	24.7	540.8	9.5
46	9	ch	-2.84	Ia	3.2	293.4	12.4	15.1	342.3	18.5	5.4	317.7	7.1	25.5	342.6	3.9	3.4	510.6	20.5	20.5	971.7	49.7	1.8	397.2	18	13.4	434.5	32.1
47	7	dz	-2.18	Ia	5.6	177.8	11.3	7.7	164.9	10.5	13.2	321.6	9.1	14.8	274.6	0.4	17.6	510.9	22.1	22.3	857.2	5.5	1.4	477.5	12	18.4	493.9	17.5
48	7	dz	-2.48	Ia	8.2	332.4	5.5	14.7	145.2	16.2	7.8	617	45.6	20.7	1638.5	64.3	13.2	892.3	86.7	37.7	5994.3	83.7	7	421.4	21.7	29.3	1228.8	36
49	8	dz	-2.87	Ia	0	295.8	11.1	15.6	363.5	1.5	12.6	347.9	5.1	17.4	807.5	0.7	5.7	311.9	9.2	15.2	264.4	40.7	0.7	375.3	9.6	21.8	429.3	1.5
50	9	dz	1.71	Ib	1.4	144	5.4	6.5	78.4	6.8	7.2	296.8	11.5	17.2	430.1	67.5	0	0	0	0	0	90	7.5	503	13.9	35.4	728	6.9
51	9	dz	1.96	Ib	4.6	259	7.7	14.2	214.9	2.1	8.1	342.2	12.5	17.5	459	4.8	0	0	0	0	0	90		0	11	0	0	90
52	8	ch	1.08	Ib	0	97.1	1.98	7.26	11.3	0.83	8	92.25	1.5	6.93	8.8	4.69	0	68.07	2.15	4.44	7.51	14.21	8	71.59	12.34	6.48	11.92	1.16
53	8	dz	1.29	Ib	18	90.07	1.16	1.89	1.72	35.43	26	102.49	1.31	2.44	2.51	19.41	2	81.13	2.03	1.67	2.67	0.51	12	87.11	11.67	2.69	3.52	23.45
54	8	ch	1.25	Ib	18	79.5	2	4.04	6.35	12.72	2	93.58	3.33	2.87	7.52	36.63	10	90.82	2.45	2.12	4.08	43.13	4	87.15	12.24	2.85	5	5.22
55	8	ch	1.45	Ib	20	89.71	4.39	2.74	9.45	44.64	10	86.44	3.92	8.73	26.89	2.78	2	103.42	2.9	4.12	9.38	5.18	0	97.92	13.55	7.11	19.8	2.97
56	9	dz	1.08	Ib	12	75.37	5.53	7.38	32.07	9.31	0	86.45	3.31	12.42	32.26	26.76	2	111.74	4.49	9.99	35.22	11.61	10	89	4.42	7.79	27.02	0.31
57	9	dz	1.28	Ib	4.4	215.4	10.4	16.2	249.3	12.1	0.2	292.5	5	11.9	98.7	2.5	1.4	160.4	5.8	8.9	84.9	28.2	1.2	200.1	15.3	12.4	120.5	1.6
58	9	dz	1.29	Ib	2.4	161.1	3.2	8	63.1	16.6	8.4	223	5.1	7.6	74	3.3	2	166.1	5	5.7	76.7	20.1	4.6	246	12.7	13.4	244.7	45
59	8	dz	1.43	Ib	30.4	117.8	7	7.3	66.1	51.2	21.4	164.1	8.6	14.4	190	19.6	3.4	167.1	17.4	8.6	339.8	78.4	12.6	208.8	10.7	11.4	265.1	36.3
60	9	dz	1.53	Ib	4.6	161.2	4.5	6.6	75.9	23	8.2	308.4	7.7	9.2	151.2	31.6	8	185.4	3.3	10.5	83.5	2.5	10.6	299.1	6.9	9.1	131.3	12.7
61	7	ch	1.04	Ib	1.4	238.7	7.9	16.7	216.8	10.1	14.4	326.8	9.4	10.6	232.3	63.9	4	186.9	14.2	9.4	196.2	56	1.2	236.7	9.8	14.4	342.9	2.1
62	7	ch	1.92	Ib	6.8	175.8	9.1	6.2	105.4	44.4	7	290.7	9.5	14.7	238.6	8.1	9.6	193.4	10.6	10	151	21	13	288.3	6.9	14.1	201.7	9.7
63	9	dz	1.04	Ib	13.2	196.1	6.8	12.2	170.7	23.6	8.6	344.3	22.7	12.6	514.1	69.3	10.2	210.9	6.9	17.1	240.1	19	3.4	203	14.1	11.8	100.1	3.1
64	7	dz	1.16	Ib	5.2	290.3	5.3	10.7	142.2	5.5	11	331.2	3.9	11.3	115.7	0.9	9	210.9	5.5	8.5	98.1	8.3	10.6	219.3	3.8	9.1	72.3	3
65	7	dz	1.24	Ib	19.6	219.7	11	11.7	276.6	89.5	22.6	371.8	6.6	18.9	239.8	8	0.2	219.6	11.4	9.5	253.6	72	5.8	249.2	6.4	16.9	186	0
66	8	dz	1.53	Ib	5	206.7	6.3	17.5	198.4	1.1	2.2	314	4.7	23.7	206.2	13.6	5.6	241.5	6	14.4	161.8	16	4.2	404.4	9.5	23.2	475.9	15.2
67	7	dz	1.34	Ib	3.6	209.9	8	16	190	6.3	7.8	367.1	8.7	22.8	401.5	9.5	2.4	243	9.3	15.1	284.5	37.6	6.2	364.6	12.7	25.8	585.2	29
68	8	dz	1.32	Ib	8.8	162.7	7.3	9.3	125.9	28.1	7.8	247.9	11.6	18.9	397.1	12	0	244	7.8	11.7	167.5	85.3	1.8	233.7	9.3	10.9	177.7	13
69	8	ch	1.57	Ib	8.6	195.4	5.2	6.7	74.8	5.8	3.8	285	5.3	13.8	147	11.1	10.6	256.3	8.1	9.5	164.8	1.4	9.4	359.6	6.2	12.2	189.9	0.1
70	8	ch	1.76	Ib	14.2	446.8	16.4	24.4	936.7	29.1	11.4	311.9	12.3	19.3	506.3	8.5	13.6	263.5	16.9	11.7	364.2	27.3	2.3	315	14.4	20.4	440.2	59.5
71	9	ch	1.27	Ib	2.8	161.1	5.4	15.4	177.8	6.1	0.5	267.4	6.3	31.6	415.1	0.8	9	263.9	13	25.4	648.3	26.3	3.2	300	7.6	15.9	311.7	2.7
72	8	dz	1.29	Ib	3.6	238.9	13.8	12.6	238.1	20.7	5.3	279.3	9.8	13.2	302.2	27.8	0.6	270.8	4.6	13.1	153.8	22.6	2.6	383.1	12.2	37	889.6	25
73	8	dz	1.92	Ib	5	223.6	14.1	13.3	374.9	15.8	7.8	246.1	8.7	17.3	296.1	28.1	1.4	273.8	18.9	9.2	216	73.6	5.4	215.5	9.1	9	139.6	39.2
74	7	dz	1.16	Ib	12.6	272.3	11.7	15	368.5	50.8	20.8	413.8	11.6	34.3	630.8	8.1	17.6	277.9	11.4	22	378.3	17.7	18	299	10.1	14.6	226.4	15.6
75	7	dz	1.98	Ib	1.2	279.7	12	16.1	402.9	35.2	5.2	452.4	16.2	20.5	680.6	1.6	4	286.1	14	30.7	553.4	25.1	1.2	355.3	11.6	33.5	757.9	16.1
76	7	ch	1.19	Ib	15.4	232.8	6.9	14.3	205.9	3.1	14	266	6.9	16.1	256.1	7.8	2.4	298.6	10.5	16.8	497.1	3.8	13.8	242.4	5	11.8	177.6	11.2
77	8	dz	1.92	Ib	2	117.45	2.15	2.68	4.53	12.16	4	94.53	2.81	4.86	50.71	43.62	2	304.37	3.65	4.21	12.07	19.77	4	89.76	2.5	4.08	8.02	12.44
78	8	ch	1.5	Ib	4	289	25.3	14.3	621.4	1.3	19.1	412.2	10	15.6	329.8	9.9	1	312.9	11.8	14.4	465.4	35.9	2.2	371.6	13.5	20.7	481.8	6.4
79	7	dz	1.15	Ib	5.6	210.8	5.3	6.9	107.5	12.8	10.6	345.3	11.1	15.5	282.6	6.3	4.2	327.4	7	11.7	164.7	14.7	2.6	353.5	8.8	15.5	328.2	1.1
80	8	dz	1.36	Ib	17.8	280.5	6.5	10.9	165.2	9.1	11.6	315.7	9.3	10.4	254.5	29.1	5.2	334.3	9.9	16.5	338	68	2.7	423.1	10.2	41.7	287.9	55
81	7	dz	1.47	Ib	3.6	240.1	7.4	13.3	217.8	21.5	2.6	276.8	7	13.9	174.5	8.5	2.2	338.6	24.3	16.9	608.7	4.8	2.2	335.1	7.5	16.1	273	8
82	9	ch	1.14	Ib	9.2	138.5	3.1	10.2	73.4	6.1	7.8	242.2	8	11.1	215.6	0.7	5	340.8	22.6	20	776	87.6	4.1	292	7.5	20.4	272.7	3.8
83	8	dz	1.01	Ib	5	250.9	14.8	17.3	593.2	73.1	5.8	342	12.5	21.3	498.7	5.3	1.4	353.2	13.3	17.8	541.5	18.2	2.1	581.5	16.2	17.9	1763.4	76.5
84	9	dz	1.61	Ib	10.6	259.3	7.8	18.8	301.2	7.1	5.2	392.4	10.9	26.8	526.1	8.6	0.8	360.5	8.2	16.3	293.3	24.4	7.9	434.2	8.2	13.4	494.9	0.6
85	9	ch	1.23	Ib	20	245.3	5.3	21.4	175.3	0.1	15.9	394.4	11.8	18.6	648	3.8	5.2	374	14.7	22.7	492.2	20.2	7.6	446.9	15.8	21.7	635.7	38.6
86	7	dz	1.23	Ib	6.4	315	7.9	11.3	195	20.7	10.9	374.9	10.3	18	346.7	8.6	1	374.4	7.2	16.3	292.9	26	1.3	344.3	13.3	12.3	326.5	9.8
87	8	dz	1.22	Ib	4.2	362.9	10.7	20.4	609.2	45.8	3.1	475.9	8.7	19.5	423.7	8.7	3.8	476.1	18.6	23.3	727.9	17	3.7	642.2	9.5	24.2	591.6	13.2
88	8	ch	1.45	Ib	17	231.2	6.4	13.7	178.5	19.6	17.9	303.3	11.9	11.9	320.6	50.5	3.4	489.8	21.1	28.7	1195.5	77.3	0.2	338.8	10	14.2	346.7	0.6
89	9	dz	1.3	Ib	0.6	267.1	13.2	13.8	345.9	27.1	10.3	304.5	15.1	15.1	432.1	3.4	7.4	491.8	14	23.3	671.6	2.5	3.1	620.8	11.7	21.4	666.2	2
90	8	dz	1.55	Ib	5.4	319.3	9.7	19.1	401.2	6.7	6.5	381.7	10.6	14.9	337.1	24.5	1.8	606.9	23.3	35.8	1693.1	29.6	4	651.8	11.2	20.6	1105.9	13.5
91	7	dz	1.02	Ib	5	377.3	21	25.5	768.5	75.6	9.7	566.2	24.3	19.8	954.7	1.1	4.4	729.5	19.1	46.4	1555.5	15.4	1	641.5	18.4	36.2	1290	1.3
92	9	ch	1.55	Ib	12.4	488.9	15.1	22.9	842.6	25.1	0.5	564.5	20.3	36.8	1562.7	48.8	2.4	812.2	29.4	51.5	3043.3	14.8	3	648.4	21.4	36.9	2245.7	51.2
93	7	dz	1.67	Ib	3.2	162.8	3.3	7.7	56.1	13.2	4.2	274.2	4.4	6.7	79.8	4.4	9.2	206.4	9.5	11.1	178.2	4.6	9.4	402.9	8.4	14.8	230.4	10.7
94	7	ch	1.56	Ib	1.2	290.3	6.7	9.7	153.7	29.1	2.8	406	8.4	18.3	373.4	8.8	10.4	328.5	12.3	10.9	243.8	1.5	1.4	342.5	15.4	29.9	666.9	22.6
95	7	ch	1.65	Ib	1.2	510	17.7	37.6	1291	2.2	3	493.4	11.6	23.4	731.3	10.2	6.2	401.2	16.2	25	686.1	9.5	7.6	454.1	14.7	24.3	640.8	17.8
96	7	ch	1.04	Ib	9.2	462.4	16.3	17.3	583.1	32.7	2.4	534.3	19.9	41.2	1195.2	11.3	0.4	420.1	16.4	23.4	584.1	15.8	8.4	621.5	14.4	28.1	1028.6	6.5
97	9	dz	1.12	Ib	2.4	665	30.5	68.1	3899.3	83.3	1.5	558.4	19.2	45.3	1509.3	65.1	1	725.4	23.8	60.4	2661	64.7	1.3	778.2	20.6	40.2	1911.3	4.4
98	7	ch	2.97	Ic	1.2	203.1	4.1	11.6	106.2	8.5	0.2	280.1	3.5	17.3	173	1.6	8.4	489.5	20.3	14.6	199.4	15.6	10	386	16.4	19	311	3.2
99	7	dz	2.87	Ic	16	163	2.7	8.8	51.3	0.3	17.6	169.5	2.9	7	62	7	4.6	501.1	24.5	10.8	100.8	7	6.4	402.7	15.4	18.3	115.2	2.4
100	8	dz	2.32	Ic	3.6	177.1	8.1	17	245.5	14.4	0.6	183.9	3.7	7.7	71.5	2.3	2.6	623.7	19.5	10.2	250.8	34.3	6.4	351	17.5	12.1	234.7	4.4
101	9	dz	2.15	Ic	5.8	261.1	6.5	11.9	209	14.5	9.7	260.8	5.7	15	153.3	0.6	5.4	426.6	16.4	10.9	110.1	18.5	7.1	331.4	5.4	44.6	182.2	9.3
102	7	ch	4.05	Ic	8.8	202.1	6.3	10.2	124.9	17.2	4.8	340.9	10.8	14.7	246.1	9.5	1.2	438.8	15.5	13.4	156.5	5	0.2	448.1	27.7	21.7	155.9	14.6
103	8	ch	2.39	Ic	9.8	195	4.9	14.7	125	0.4	5.4	238.4	3.4	13.1	96.1	0.8	13.2	551.4	13.5	17	281.2	12.3	8.6	410.7	17.2	19.6	138.9	12.7
104	8	ch	2.32	Ic	17.2	158.8	21.5	19	478.3	36	9.8	111.9	5.8	7.8	97.1	17.3	15.6	459.3	35.3	30.9	1491.8	87.8	54	375.2	21.3	16.8	459.3	74.5
105	9	dz	2.55	Ic	3.6	267.3	6	17	194.2	8.4	0.4	215	4.3	12.4	130.3	8.7	4.6	474.6	6.5	24.1	359.3	27	8.2	352.3	14.6	18.3	556.5	47.5
106	8	ch	2.34	Ic	2	325.2	8.7	13.3	205.4	15.6	4.9	386.2	9.5	13.9	290.1	17.9	3	399.9	8.7	13.1	308.2	16.1	1.8	403.3	13.7	18.3	568	29.3
107	8	dz	2.13	Ic	19	223.4	6.1	8.4	86.2	9.2	8.1	349.6	11.7	15.4	394.1	44.8	0.2	311.2	8.5	14	301.4	13.5	5.8	375.6	19.7	34.9	643.5	14.2
108	8	ch	2.32	Ic	12.4	284.3	10.6	18.3	448.1	12.4	10.2	350	9.5	13.6	327.5	5.8	7.2	413.4	9.2	18.5	297.8	21.4	8.6	427.8	10.8	24.3	498.3	5.8
109	7	dz	4.71	Ic	3	372.5	12.8	21.3	481.3	2.7	5.6	543.2	14.8	22.2	612.6	30.4	8.4	319.3	11	13.3	307.4	40.7	6.4	384	18.5	16.1	288	14.3
110	7	ch	3.15	Ic	28.4	387.3	16.7	31.6	695.4	14	23.2	336.5	5.5	16.9	238.4	4.6	8	422	12	27.8	634.2	7.2	6.8	379	11.1	26.4	694.1	13.9
111	9	ch	2.28	Ic	6.4	361.2	9.4	16.1	379.6	5.1	5.1	411.3	13.7	15.4	456.1	40.2	9.2	434.7	15.3	19	414.2	69.6	2.2	503	10.3	23.9	542.2	26.8
112	8	dz	2.44	Ic	5.2	253.3	9.3	11.7	250.5	13.7	0	411.1	9.6	17.8	383.1	30.3	11.8	471.4	9.5	11.4	235	38.4	14.7	692.7	12.5	20.2	569	8.6
113	7	ch	3.73	Ic	14.4	354.7	10.4	13	370.7	49.7	12.1	510	7.6	18.3	332.6	3.4	4.2	393.4	14.7	19.6	552.8	76.9	8.7	420.5	11.9	19.3	404.9	11.6
114	9	ch	3.14	Ic	4.4	228.6	13.9	29.7	377	2.4	1	357.1	8.8	25.9	514	8.7	2.8	440.3	16.9	24.3	801.7	1.5	3.9	448.5	15.2	44.1	1204.4	27.5
115	8	dz	2.24	Ic	17.6	267.8	11	31.1	371.1	82.7	21.3	477.6	10.5	18.7	333.8	59.5	12.4	452.8	10.4	35	614.7	74	11.8	532.1	22	17.6	470.4	15.7
116	8	dz	2.9	Ic	5.4	318.9	7.6	26.7	377.3	25.8	2.4	246.2	4	14.4	160.1	0.7	12.8	520.2	41.4	42	2177.5	57	10.9	547.6	23.4	54.8	2032.9	76.1
117	7	ch	2.19	Ic	5.2	249.5	7.2	19.3	276.4	12.8	0.2	289.2	6.5	19.7	232.4	3.5	5.4	479.7	18.5	14.4	241.4	7	3.4	336.9	19.2	27.3	373.4	3.3
118	8	dz	2.17	Ic	2	111.32	3.96	1.51	4.69	10.69	18	93.01	3.76	2.83	8.35	10.21	20	384.58	1.88	22.08	3.06	32.76	6	405.02	12.41	3.85	7.29	23.6
119	7	dz	2.96	Ic	10.4	143.6	3.7	7.8	60.4	4.6	11.4	239.3	3.5	14.4	91.2	5.1	5.8	410.1	17.4	18.8	253.5	61.5	0	457.2	17.8	17.8	254.1	17.4
120	9	dz	2.44	Ic	4.8	250.2	7.6	16.2	229.5	16	4.4	349.1	5.1	15.5	148.1	1.6	1	473.1	16.6	14	198.8	6.7	1	412.4	8	34	548.7	7.9
121	7	ch	2.3	Ic	0	65.28	1.87	3.39	4.97	19.01	2	83.19	2.53	4.4	9.75	19.01	4	310.6	13.07	25.16	12.45	4.34	0	406.91	9.36	16.77	49.79	24.99
122	8	ch	2.5	Ic	2.2	83	5.2	8.3	73.8	39.2	5.2	580.5	13.5	39.8	1268.1	5.5	0.6	431.6	7.9	12.2	225.1	0.4	6.8	458.9	14.6	21.8	717.7	31.4
123	9	dz	2.24	Ic	2	275.4	6.4	10.5	197.4	0.8	0.3	289	15.2	13	347.1	3.1	1.6	449.7	16.3	10.7	136.2	1.9	1.6	383.7	8.2	16.6	250.9	1.8
124	7	ch	2.31	Ic	20	95.15	2.87	9.59	21.6	3.5	12	122.93	4.82	8.99	33.99	4	14	496.04	14.01	18.22	25.9	13.97	6	494.81	4.14	5.63	18.31	19.98
125	8	dz	2.21	Ic	10	158.44	9.98	4.6	36.02	2.2	8	125.94	1.47	5.2	5.99	21.62	4	435.34	21.71	22.86	3.84	0.74	2	250.88	1.36	3.93	4.19	9.19
126	8	ch	3.85	Ic	4	97.91	3.87	2.75	8.35	31.39	2	105.8	2.83	5.54	12.34	21.6	8	412.45	2.84	13.29	7.34	18.52	2	323.46	2.99	6.91	16.24	15.55
127	9	dz	3.16	Ic	1.8	200.9	7.5	8.3	131.7	9	3.8	344.6	4.2	18	145.5	15.4	0.8	458.9	15	12.5	162.9	3.4	0.8	309.8	4.8	20.4	152.2	9.4
128	7	ch	3.28	Ic	2.2	138.2	5.9	7.3	63.9	23.1	1	148.6	5.8	9.8	88.3	16.1	6.8	587	32	23.7	784.1	38.6	8	650.2	28.7	14.2	277.7	13.9
129	7	dz	2.14	Ic	3.4	246.1	7.3	10.9	149.4	21.4	8.6	350.6	6.5	13.4	189.1	11.2	21	393.6	22.1	22.2	470.9	12.1	20	578.6	19.4	31	909	15.8
130	7	dz	3	Ic	7.6	297.4	5.6	11.7	158	3.6	9.8	267.1	4.6	15.4	132.1	8.1	5.8	491.2	6.1	16.1	174.5	9.2	1.8	461	8.9	18.1	421.9	0.1
131	8	ch	0.05	II	22	69.38	3.5	4.31	11.83	42.78	6	30.37	4.26	6.84	22.88	18.9	2	26.69	2.15	3.76	6.34	43.81	0	70.91	5.18	4.17	16.99	17.01
132	8	ch	0.92	II	14	69.14	1.75	3.27	4.49	12.76	14	149.28	2.43	3.66	6.99	11.74	4	53.97	1.68	2.2	2.9	19.55	8	65.03	3.44	2.77	7.48	39.92
133	8	dz	-0.32	II	26	70.36	3.07	2.28	5.48	5.09	0	65.74	4.8	2.74	10.32	18.99	2	55.58	2.91	1.47	3.37	17.78	34	69.02	3.04	4.23	10.1	40.02
134	8	dz	0.12	II	4	142.88	6.63	4.64	23.13	4.18	16	11.98	8.48	6.64	44.23	44.29	28	80.79	6.1	3.04	14.58	5.75	28	102.78	4.45	9.04	31.6	19.16
135	8	dz	0.31	II	2	94.01	1.97	3.28	5.07	14.86	12	91.17	2.61	3.63	7.45	37.1	16	83.23	4.05	10.13	32.2	0.59	2	68.32	4.55	4.24	15.17	33.07
136	8	dz	0.09	II	8	122.45	3.41	4.04	10.81	5.97	6	116.2	2.96	4.49	10.43	1.82	22	85.31	0.49	3.29	10.13	32.08	16	125.23	3.15	4.46	11.55	13.81
137	8	ch	-0.29	II	2	83.49	3.08	7.2	17.47	43.63	2	155.35	10.15	7.48	59.66	3.79	16	85.67	4.19	0.743	24.46	44.2	8	95.83	3.8	7.52	22.47	40.77
138	8	ch	-0.38	II	2	99.63	2.22	7.46	13.04	29.56	4	98	2.71	3.45	7.36	12.71	2	86.22	4.04	2.67	9.47	29.43	10	96.06	5.5	3.88	16.77	41.94
139	8	dz	-0.27	II	3	99.39	1.77	5.55	7.73	37.45	2	99.69	3.03	2.2	5.23	40.41	4	87.57	1.74	3.06	4.18	29.49	10	87.04	2.29	4.55	9.18	5.87
140	9	dz	0.17	II	9.2	79.1	2.3	3.8	21.9	82.1	5.3	110.9	3.8	4.9	41.1	43.6	9	88.7	2.8	3.1	18.2	12.8	7.1	132.4	3.9	5.4	43	50.2
141	9	ch	0.28	II	14	91.96	2.74	7.31	15.73	39.1	2	116.3	7.37	3.32	19.18	20.03	10	93.64	3.57	3.26	9.16	13.91	2	110.03	6.97	5.88	31.71	33.86
142	8	ch	0.66	II	4	104.7	1.56	3.64	4.45	12.95	12	110.67	1.73	3.56	5.04	26.01	6	96.4	4.49	2.5	8.8	9.1	8	105.35	1.41	3.83	4.24	14.29
143	8	dz	0.95	II	2	91.63	1.66	3.83	5.01	37.35	4	115.99	4.38	5.79	19.92	-14.5	6	105.61	1.88	3.87	5.7	12.79	8	110.64	2.83	6.61	14.68	1.19
144	8	dz	-0.17	II	4	439.9	14.5	21.4	557.8	31.6	4.2	596.4	27.1	24.1	870.5	30	17.4	132.6	7.1	8.6	159.2	4	6.4	119.3	7.5	17.7	301	0.9
145	7	dz	0.7	II	12.8	479.2	21	35.3	1114	43.5	19.8	219	4.4	7.7	81.5	10.9	1.4	133.3	5.3	6.8	58.4	24.9	0.2	176.2	10	9	149.8	35.3
146	8	dz	0.3	II	24.6	250.7	9.8	19.1	399.9	7.4	17.5	218.2	5.7	13.4	172.5	11.6	6.6	170.7	4.5	12.8	103.6	3.2	11.7	251	6.2	15.1	221.4	23.9
147	8	ch	-0.09	II	2.4	116	4.6	6.6	60.3	6.4	0.6	170.7	6.1	11.8	148.7	0.5	3.4	171.4	5.5	13.8	172.8	3.1	5.4	194.9	9.5	15.7	351.9	3.1
148	9	ch	-0.36	II	11.8	173.3	4.3	7	60.2	6.5	12	263.1	5.5	18.8	151.7	8.1	7.8	177.9	4.8	6.1	70.8	3	9	159	7.3	6.1	72.7	11.3
149	8	ch	-1.24	II	0.8	229.7	7.3	18.4	259.8	4.7	1.9	191.3	4.7	7.4	74.8	21	1.6	88.6	9.2	13.8	253.7	24.7	0.3	322.4	13.2	16	400.5	5.8
150	8	dz	0.18	II	9.4	160.6	6.3	7.5	89.3	2.5	9.6	248.8	4.3	12.4	170.9	11.3	4	98.4	6.5	5.4	86	20.4	7.3	289.4	8.2	8.2	163.2	0.5
151	9	dz	0.18	II	0.2	186.3	5.9	14	163.8	10	4	234.7	7.2	10.8	164.2	36.4	1.6	101.6	16.2	12.5	234.5	85.3	2.6	203.2	9.6	17	368.9	27.7
152	9	dz	0.13	II	7.2	206.5	10.3	10.3	184.3	32.2	4	252.3	8.3	19.9	258	10.9	10.4	102.6	9.2	7.9	182.4	9.5	12.2	331	7.9	11.8	232.4	2.6
153	8	dz	0.16	II	7.2	196.1	10.1	9	210.3	7.5	0.8	191.6	2.6	18.3	103.5	10	14.8	104.1	5.2	10.9	130.2	22.1	6.4	259.6	4.8	7.9	91.5	1.5
154	8	ch	-0.55	II	11	171.7	5.3	6.3	61	5.1	9.6	229.9	3.8	9.9	102.3	4.3	2.2	96.6	7.2	9	138.6	11.4	7	285.8	4	15.7	159.6	6.2
155	9	dz	0.37	II	8.6	134.3	3.4	6.6	63.8	3.9	5.4	156.9	3.7	7.8	78.4	23.6	8	86.9	8	7.6	94.8	56.6	1.4	199.7	3.8	7.7	63.1	28
156	8	ch	0.16	II	4.4	152	6.4	17.3	300.4	8.1	5.4	167	10.4	14	230.4	33.4	13	228.3	8.1	10.5	179.1	8.1	2.4	270.8	14.3	15.9	450.8	31.2
157	8	dz	0.83	II	23.2	311.8	5.2	12.9	181.8	80.8	16.9	272.5	7.7	21.3	290.2	11.2	26.6	230.7	10.1	9.1	161.7	12.1	10.3	305	9.4	18.1	277.2	45.8
158	8	dz	-0.83	II	6.6	311.9	16.3	17.9	523.2	36.9	13.7	287.8	8.8	13.3	279.8	23.4	4.4	230.9	6.6	7.8	118.6	32.1	3.4	263.2	15.3	37.5	944.6	1.1
159	8	dz	-0.28	II	9	224.5	5.3	13.2	159.8	11.2	6	255.3	5.7	11.1	145	7.4	4.8	132.9	7.2	12.6	182.2	4.5	7.9	228.5	5.7	13	210.1	21.9
160	8	ch	0.11	II	0.6	216.9	5.7	19.1	221.3	30.4	0	213.9	4.9	21.2	192.4	5.2	5.8	243.4	8.5	11.1	160.4	4.7	5.3	218.8	4.2	10.1	94.5	0.3
161	7	dz	0.31	II	11	185.4	7.1	11.9	136.4	33.1	12.6	219.3	4.6	14.7	128.9	7.3	13.4	258.4	8.7	11.4	177.4	40.4	18.8	304.3	6.1	12.8	187.8	0.1
162	8	dz	0.72	II	3.6	182.4	5.8	9.5	121.5	37.6	2.4	350.7	9.2	19.1	338.7	12	3.2	259	6.9	9.3	178.3	26.6	0.7	310.6	5.8	19	254.1	1.6
163	8	ch	0.01	II	2.6	201.6	9.3	10	165.4	26.2	2.3	193.7	7.6	10.8	212.6	7.3	1.8	265.6	6.6	10.9	194.9	5.9	3.6	290.1	10.3	24.8	434.8	16
164	7.5	ch	-0.14	II	19.2	280.3	11.7	17.9	310.3	73.4	22.5	335.7	10.4	17.5	355.1	12.4	3.8	270.9	6.2	13.3	228	26.7	3.9	361.9	11.1	25.9	564	24.4
165	7	dz	0.42	II	4.8	183	6.3	6.5	101.3	38.8	0.6	239.2	8.1	11.5	175.4	16.2	2.4	283.9	8.8	14.1	253.6	8.8	3	259	5.2	10.5	135.2	4
166	9	ch	-0.1	II	1.4	227.2	7.8	8.3	180.2	7.6	1.8	300.7	5.4	22	219.9	2.5	6.4	286.8	10.8	10.3	214.1	8	0.3	338.8	11.9	11.1	247.4	10.2
167	9	dz	0.51	II	7.6	161.5	4.3	14.5	124.6	11.1	5	387.7	16.4	21.6	557.8	12.1	3.8	294.6	11.2	14.4	371.6	34.9	0.5	418.9	6	13.6	259.8	1.7
168	8	ch	-0.33	II	10.2	257.5	6.1	6.7	101.6	1.9	14.8	511.8	17.8	17.4	536.8	1.8	11	295.2	5.9	10.6	183	22	21.8	327.3	7	9.9	155.5	7.7
169	7	dz	0.82	II	0	269.8	10	14	265.4	4	6.8	274.1	8.7	17.9	257.1	1.1	16.2	299.6	7.5	18.1	349.5	3.9	0.8	339.4	13.4	26.5	561.4	11.7
170	8	ch	0.45	II	0.2	244.4	11.4	14.6	373.8	70.7	5.8	312.4	9.1	13.6	345.5	10.1	10.8	308.4	10.9	13.9	299.3	5.5	15.4	282.2	9.3	11.1	228.2	21.8
171	7	dz	0.83	II	12.2	247.9	6.8	16	197.3	19.1	12.8	354	8.8	14.7	233.8	16.9	10.8	308.5	8.6	23.3	404.5	7.8	10	343	12.4	16.4	333.8	9.7
172	9	ch	0.96	II	22.4	233.6	6.5	9.3	131.4	2.9	29.9	283.9	12.8	20.9	564.6	75.2	11.2	314.1	8.4	15.5	320.1	32.9	12.3	423.6	13.5	14.5	444	21.9
173	7	dz	0.45	II	9	217.4	4.4	10.5	117.5	9.5	13.8	292.4	7	13.9	177.3	4.7	16.8	314.2	8.6	19.3	311.9	1	16.8	228.9	17.5	23.9	804.3	26.9
174	8	dz	-0.34	II	8.6	180.9	4.2	8.9	96	16.6	8.2	268.9	8.6	7.7	124.5	0.6	0.4	315.7	5.8	9.3	124.9	42.6	1.4	593	24.3	34.6	1055.7	4.4
175	7	ch	-0.11	II	1	334.3	6.6	11.2	173.2	9.3	2.2	373.8	10.7	12.4	288.3	3.1	7.2	316.1	14.2	11.5	426.6	57.8	12	339.9	10.9	12.8	286.3	9.9
176	8	dz	-0.35	II	7.6	216.2	8.4	12.1	246.9	31.2	7	444.2	10.8	12.3	272.3	15.7	1	325.1	15.2	8.8	315.4	61.3	3.4	326.5	11.6	12.1	280.3	20.6
177	8	ch	-1	II	0.8	191.2	10.4	11.8	252.5	21.6	3.2	422.5	19.5	18.3	666.9	12.3	8	326.5	11.6	14.6	375.5	26.9	10.6	298.1	19.3	18.8	781.6	63.7
178	7	dz	-0.55	II	1.2	409.6	19	10.3	432.8	83.4	2.6	457.4	7.3	19.5	253.7	0.3	1	331.4	19	18.1	338.6	27.8	2	279.7	7.2	16.1	279.5	9.4
179	8.5	ch	0.07	II	5	282.9	14.4	17.9	352.2	11.4	4.5	382.6	8.8	13.2	241.7	20.6	7.4	334.5	13.2	12.4	314.9	69.9	5.1	432.9	11.1	14.6	343.9	43.4
180	8	dz	-0.31	II	8	259.5	5.6	17.7	242.3	73.2	0.2	259.9	6.6	7.4	133.2	8.1	6.4	334.7	7.3	9.3	202.6	52.5	5.5	436.5	12	11.9	373	14.9
181	8.5	ch	-0.3	II	10.2	233.8	5.7	16.1	243.4	41.5	9.4	265.2	12.1	13	216.3	22.6	10.6	335.8	13.8	23.9	592.3	38.9	11.6	430.4	10	25.7	550.2	7.8
182	8	dz	0.34	II	1.8	244.6	6.8	21.9	287.7	11.8	4.2	320.8	8.1	11.9	238.5	48.6	3.2	338.2	9.8	19.5	270.3	14.4	0.9	278.1	6.5	9.4	142	8.8
183	7	ch	0.06	II	3.2	432.4	10.3	10.4	266.4	34.3	6.2	390.3	11.4	12.8	276.6	2.2	0.4	353.2	9.7	14	282.5	27.8	4.2	322.2	19.8	14	474.1	46.4
184	7	ch	0.59	II	6	474.4	10.6	23.5	494.6	4	1.6	499.2	11.5	29.5	635.5	5.5	0	361.2	11.8	24.5	544.1	24.5	1.7	378.2	10.9	19.7	380.2	78.5
185	8	ch	0.17	II	0.2	247.8	7.7	11.1	220.6	13.2	2.8	357.7	9.6	13.8	328.5	30.2	12	366.5	11	13.3	341	13.2	10.6	465.6	10	22.6	476.1	14.9
186	9	ch	-0.55	II	10.8	314.5	11.3	20.4	516.6	22.5	6.4	279.1	12	13	323.6	55.7	17.6	373.9	12.9	12	376.8	6	15.5	353.1	11	18.2	336.3	5.9
187	8	ch	0.76	II	0.6	299.8	19.3	21	638.5	79.8	1.6	304.1	13.6	21.2	521.3	25	3.8	379.7	14.8	38.2	720.3	84.3	2.8	542.2	24.9	42.2	2517.8	89.3
188	9	dz	-0.41	II	10.2	323.5	8.7	20.2	389.7	7.1	5.8	346.2	17.2	19.1	669.2	24.4	12.2	379.8	13.1	14.2	349.1	11.2	10.3	587	13.6	22.9	1027.7	7.2
189	8	ch	0.34	II	0.4	472.1	14.4	31.5	815.3	34.3	18.1	546.3	20.3	51.3	1726	73	2.4	381.4	14.2	19.1	602.9	67.3	3.9	579.2	19.1	22.7	991.4	41.3
190	9	ch	-0.32	II	2.6	319.8	8	22.5	396.9	6	8.1	353.3	14	13.5	274.2	30.2	0.6	392.7	11.9	14.7	417.6	69.1	5.7	499.4	15.2	16.9	706.3	78.7
191	8	dz	-0.7	II	4	245.7	4.6	11.9	123.7	3.5	1.7	394	14.3	20.7	536.2	1.8	7	405.9	9	23.2	445.4	17.8	7.3	674.5	10.5	32.1	808.3	10.5
192	9	ch	0.03	II	0.8	176.3	2.7	8.4	46.4	5.4	0.5	172.7	4.9	10.5	87.5	6.8	3.2	478.2	32.5	38.4	1513.4	22.2	2.6	434.5	10.9	27	450.1	27.2
193	8	ch	0.65	II	1	212.5	10.1	12	227.4	28.1	0.4	284	6.8	8.2	136.8	2.6	5.2	503.6	8.2	16.9	291.8	23.1	1.7	364.1	9.1	25.6	413.5	33.8
194	8	dz	-0.55	II	2	293.9	10	25.3	390.2	4.5	8	279.1	9.4	13.7	204.5	2.8	2.2	523.5	9.4	18.8	448.1	8.6	3.4	454.1	11.4	15.9	367.1	5.5
195	8	ch	-0.66	II	30.4	995.2	13	43.6	1334.2	86.8	16.3	900	23.4	24.9	1129.3	6.9	11.4	528.3	10.6	21.6	595.8	3.1	10.5	584	15.7	18.7	660.7	8.7
196	8	dz	-0.58	II	5.6	375.3	21	23	656.8	39.3	12.9	250.9	6.3	10.5	135.3	21	2.8	409.7	27	33.4	1366.1	11.5	0.6	371.3	6.4	24.3	387.8	6.2
197	8	ch	0.54	II	38	276	19.1	23.3	936.7	85.5	28.1	299.8	7.2	11.9	157.4	23.9	31.4	437.3	26.4	44	2053.2	28.8	26.4	414.4	14.3	18.4	529.4	28.9
198	8	dz	-0.35	II	7	241.4	4.1	8.5	83	7.8	9	257.6	6.7	11.6	202.6	28.2	0.4	183.3	8.5	16.7	278	16	13.4	385.4	12.1	23.4	492.6	18
199	8	ch	0.29	II	1.2	188.7	5.5	8.6	97.5	4.8	5.4	234.8	8.6	15.5	271.3	5.3	5.4	187	3.9	13.7	111.6	1.6	4.4	170.8	6.8	12.6	162.6	16.7
200	8	ch	0.29	II	1.2	188.7	5.5	8.6	97.5	4.8	5.4	234.8	8.6	15.5	271.3	5.3	5.4	187	3.9	13.7	111.6	1.6	4.4	170.8	6.8	12.6	162.6	16.7
201	7	dz	-0.32	II	6.4	196.3	3.9	6.6	61.5	4.6	4.2	356.4	6.7	10.5	151.9	23.2	3.4	212.5	5.2	10.3	119.5	0.5	2.6	282.1	6.8	12.4	162.2	6.1
202	9	dz	0.85	II	4.2	237.4	5.7	18	224.5	1.5	5	208	6.7	8.5	106.9	36	0.8	231.6	5.9	11.4	131.5	3.4	2.6	220.9	6	14.3	169	5.5
203	7	ch	0.98	II	18.6	279.2	7	15.4	186.3	17	17.4	237.4	5.1	12.9	119.7	13.6	30.2	234.4	6.2	8.9	131	19	23.2	294.3	5.2	12.5	145.7	18.3
204	7	dz	-0.13	II	1.4	249.4	4.6	15.8	134.2	2.3	0	359.5	6.1	18.5	222.3	0	1.2	147.5	8.7	13.8	151.5	12	1.6	358	8.9	18.6	302.9	10.5
205	8	ch	-0.09	II	7.6	210.1	9.3	12.7	229.1	29.7	8.5	486.2	11.7	30.4	717.8	12.4	14	257.9	6.1	10.2	134.6	21.1	11.3	147.1	12.4	18.8	534.9	31.6
206	9	dz	0.28	II	5.4	260.3	10.1	18.8	302.4	10.4	6.8	284.2	7.8	12.7	173.8	11.7	1.4	260.6	8.7	9.8	168.2	5.2	0	296	6	15.2	169.6	1.4
207	7	ch	-0.56	II	6.4	225.9	6.1	7.4	130.6	6.6	3.4	305.1	9.4	16.8	255.4	7.2	3.6	262.3	10.5	12.7	314.5	15.8	3.8	433.2	14.4	23.2	737.5	24.4
208	9	ch	0.08	II	9.6	211.1	7.3	13.9	154.3	0.8	14.8	271.4	6.4	15.5	170.7	3.7	11.4	267.9	11.6	8.7	219.6	65.8	6	307.4	8.5	13.5	261.6	4.6
209	7	dz	0.34	II	6.2	231.2	10.1	14.2	230.8	25.8	3.6	280.7	7.6	11.6	199.3	11.5	4.6	269.4	9.3	20	418.5	3.6	1.6	386	21.2	22.1	644.5	48.3
210	9	dz	-0.08	II	19.4	221.8	8.1	11.9	216.3	19.9	13.5	369.2	9.5	14.5	253	4.8	10.6	276.6	8.2	15.6	227.1	49.5	9.9	179.7	14.4	13.1	423.9	61.1
211	7	ch	0.01	II	7.6	303.4	9	11.8	230.5	10.3	10	428.1	12	10.7	239.8	34.3	5.2	291.4	13.9	21.4	560.9	17.7	2.8	145.4	27.2	44.8	1453.4	41
212	7	dz	0.34	II	14	221	5.1	6.8	76.9	26.4	12.2	808.9	58.9	41.2	6123.2	70.9	6.4	296.2	9.6	25.6	435.5	13.2	4.2	214.7	6.8	13.4	213.1	9.8
213	7	ch	-0.29	II	2.2	245.8	7.2	11.6	207.9	0.1	3.2	438	8.1	26.4	531.2	11.2	6.8	299.6	13	22.6	621.9	4.6	13.2	437.8	24	26.5	1012.9	33.4
214	7	ch	0.29	II	6.6	344.6	15.6	30.8	1073.7	5.5	20	117.4	4.6	12.9	123.3	0.5	0.8	310.1	10.3	14.4	316.4	11.1	5.6	357	13.8	15.3	389.3	26.5
215	8	dz	-0.76	II	5.8	207.8	9.3	14	201.7	22.1	7.5	407.9	15.8	21.1	577.5	23.6	8.8	311.2	14.5	17.1	362.2	77.5	7.1	426	14.6	32	832.7	9.3
216	7	dz	-0.23	II	1.8	310.5	7.7	16.9	313.8	6.1	8.6	261.7	7.8	11.1	226.2	10.8	2.6	316.9	15.3	14.3	436.7	51.2	9.4	366	9.3	12.8	326.4	10.4
217	7	ch	-0.88	II	2.2	267.4	11.1	23.7	313.4	23.4	2	296.3	9.5	13.8	253.8	30.2	4.8	319.1	14.5	13.9	389.8	33.1	13.4	297.4	11.5	14.8	300.9	25
218	7	ch	0.39	II	6.4	386.6	21.9	17.8	748.3	34.8	13.2	307.6	9.8	9.4	212.5	45.4	0.4	359	8.8	15.6	346.3	4.7	10.4	356.5	11.6	19.8	562.2	17.5
219	7	dz	0.07	II	1.6	313.2	8.8	11	208.4	6.7	1.8	388.1	4.9	16.1	174.4	4.9	2.6	365.1	15.3	15.6	570.4	48.9	6.4	522.4	12.5	14.8	391.4	11.9
220	7	dz	0.29	II	9	356.6	16.6	13.7	552.3	69.2	15.8	386.1	9.2	18.9	345.3	16	21.6	372.2	9.3	19.2	371.9	14.9	28.4	364.9	8.2	31.7	472.1	7.8
221	7	ch	-0.57	II	8.6	175.2	4.9	7.5	81.8	2.9	7	576.8	23.2	64.1	2176.1	4.8	1	374.1	9.1	28.1	341.1	2.3	1.6	449.3	14.4	18.7	612.9	7.9
222	8.5	ch	-0.23	II	12	526.5	23.9	56.2	2657.1	67.2	5.9	401.1	6.5	37.6	544.9	0.3	6.6	390.1	12.2	15.9	486	21.6	3.6	423	20.4	35.2	988	6.9
223	7	ch	-0.57	II	0.2	244.8	5	10.3	125.7	8	8.2	368.1	8.5	18	298.7	4	1.8	391.7	14	21.8	589.4	33.6	11.8	386	9.2	17.9	298.5	8.9
224	7	dz	-0.15	II	3.4	343.6	7.9	19.6	263.1	9.2	8.4	363.7	10.1	14.7	294.5	26.4	5.6	206.5	10.1	18.4	370	20.9	7.2	365.4	11.3	14.7	385.5	26.5
225	7	ch	-0.8	II	3.8	214.3	9.9	9.3	205.3	50.1	8.8	409.1	10.2	8.5	211.1	29.6	9.6	227.2	18.3	22.6	809	23.6	16.2	292.6	4.8	16.1	163.9	3.1
226	8	dz	-0.76	II	11.6	253.4	7.5	17.7	308.7	21.4	8.6	465.7	10	24	513.5	18.1	1.8	138.3	19.6	22.9	775.1	2.3	1.2	440.7	16.3	13.9	582.1	58.8
227	7	dz	0.36	II	15.8	305.5	9.8	18.9	292.5	10.1	22.2	325.4	9.5	13.2	264.5	2	15.2	438.5	17.9	18.3	546.5	21.9	15.8	384.1	12.4	24.1	518.5	18.8
228	7	ch	-0.44	II	8.6	230	13.4	10.8	204	15.3	9	459.3	16.2	22.5	603.6	39.9	4.4	454.9	22.2	20.7	728.2	26.9	3.8	441.9	13.5	15.7	511.9	27.5
229	7	ch	-0.41	II	29.4	178	9.8	7.9	92.1	52.6	30.8	248.8	13	11.7	280.7	47.1	9.6	473.2	17.7	18.5	608.2	49.8	19.8	452.9	14.1	19.6	608.7	25.1
230	9	ch	0.03	II	38.8	221.4	10	13.8	220.5	8.4	12.4	425.2	14.4	24	704.6	0.4	16.8	481.3	25.3	25.3	1309.8	29.8	13.6	403.4	23.5	21.1	1035.3	79.6
231	9	ch	-0.79	II	2.2	383.3	10.3	11.3	281.8	33.8	6.2	671.9	11.7	62	1152	14	7.2	512	12.8	21.5	502.4	18.7	1.4	488.6	9.6	16.6	347.4	11.6
232	7	ch	-0.16	II	7.2	342.2	6.8	11.9	201.5	11.6	3.4	403.2	5.8	27.3	244.8	2.4	0.4	520.4	28.8	25	921.8	9.9	1.2	430.9	9.4	21.2	438.2	4.8
233	7	dz	0.66	II	6.2	687.4	28	19.7	1483.1	29.1	4.6	411.8	11	21.9	545.8	2.5	13.4	289.6	15.8	18.1	653.6	30.1	5.2	601.7	7.8	17.1	349.4	4.7
234	7	ch	-0.12	II	11.4	468.4	25.5	26.2	694.5	36.3	9.8	499.9	7.7	20.7	315.7	2.9	3.6	405.5	38.4	22.2	1355.7	65	0.4	448.8	16	11.1	497	79.2
235	7	ch	0.65	II	7	334	10.9	22.2	385.5	31.9	3.2	396.7	10	13.7	305.5	0.5	3.2	510.4	25.2	26.4	1413.6	38.2	7.8	461.5	18.4	24.3	743.5	13.6

## Sheet: Arkusz1
Legend
DBWD(P/L)	Body Weight Distribution between right and left side)
SPL	COP path length, the COP area
WoE	Width of the ellipse
HoE	Height of the ellipse
AoE	Area of the ellipse
aoE	Angle of the ellipse
